# Supplementary material for: Enzyme mediated biomass pretreatment and hydrolysis: a biotechnological venture towards bioethanol production
Source: Royal Society of Chemistry journal article supplement (doi:10.1039/c6ra09541k), 2016-01-01
Supplement: c6ra09541k1.pdf [file c6ra09541k1.pdf]

Supporting information for

**Enzyme mediated biomass pretreatment and hydrolysis: a biotechnological venture towards bioethanol production**

Rajiv Chandra Rajak<sup>a</sup> and Rintu Banerjee<sup>b\*</sup>

<sup>a</sup>Advanced Technology and Development Centre,

<sup>\*</sup>Agricultural & Food Engineering Department,

Indian Institute of Technology, Kharagpur,

Kharagpur- 721302, West Bengal, India

**SUPPLEMENTARY TABLES AND FIGURES**

**(A) Fig. S1 One variable at a time approach (OVAT) for enzymatic delignification/pretreatment**

|                                                             |         |
|-------------------------------------------------------------|---------|
| Effect of solid loading on enzymatic delignification        | Page S3 |
| Effect of incubation time on enzymatic delignification      | Page S3 |
| Effect of temperature on enzymatic delignification          | Page S4 |
| Effect of pH on enzymatic delignification                   | Page S4 |
| Effect of enzyme concentration on enzymatic delignification | Page S5 |

**(B) Fig. S2 One variable at a time approach (OVAT) for enzymatic hydrolysis**

|                                                        |         |
|--------------------------------------------------------|---------|
| Effect of solid loading on enzymatic hydrolysis        | Page S6 |
| Effect of incubation time on enzymatic hydrolysis      | Page S6 |
| Effect of temperature on enzymatic hydrolysis          | Page S7 |
| Effect of pH on enzymatic hydrolysis                   | Page S7 |
| Effect of enzyme concentration on enzymatic hydrolysis | Page S8 |

|                                                                                |              |
|--------------------------------------------------------------------------------|--------------|
| <b>(C) Table S1: CCD based experimental designs for enzymatic pretreatment</b> | Page S9-S10  |
| <b>(D) Table S2: CCD based experimental designs for enzymatic hydrolysis</b>   | Page S11-S12 |
| <b>(E) Table S3: DSC temperature program</b>                                   | PageS13      |
| <b>(F) Table S4: ANOVA analysis for enzymatic pretreatment</b>                 | PageS13      |
| <b>(G) Table S5: ANOVA analysis for enzymatic hydrolysis</b>                   | Page S14     |
| <b>(H) Fig. S3 UV-spectra (a) pretreated liquid (b) standard Kraft lignin</b>  | Page S14     |
| <b>(I) Fig. S4 Response surface plots for enzymatic delignification</b>        | Page S15     |
| <b>(J) Fig. S5 Response surface plots for enzymatic hydrolysis</b>             | Page S16     |
| <b>(K) Fig. S6 SEM images for (a) raw substrate (b) pretreated substrate</b>   | Page S17     |
| <b>(L) Fig. S6c FT-IR spectra for raw and pretreated substrate</b>             | Page S17     |
| <b>(M) Fig. S7 XRD for raw and pretreated substrate</b>                        | Page S18     |

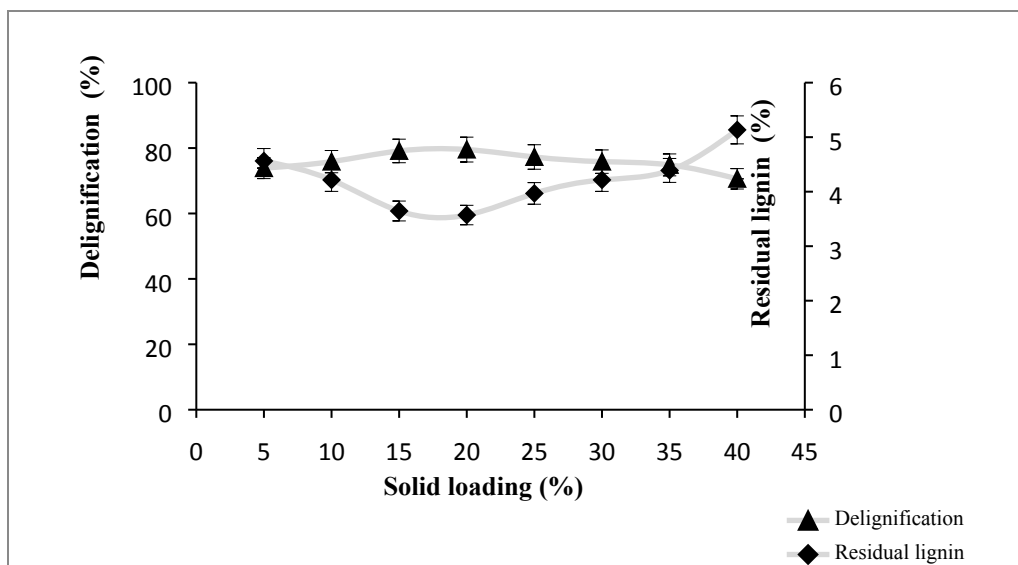

Fig. S1 (a) Effect of solid loading on enzymatic delignification

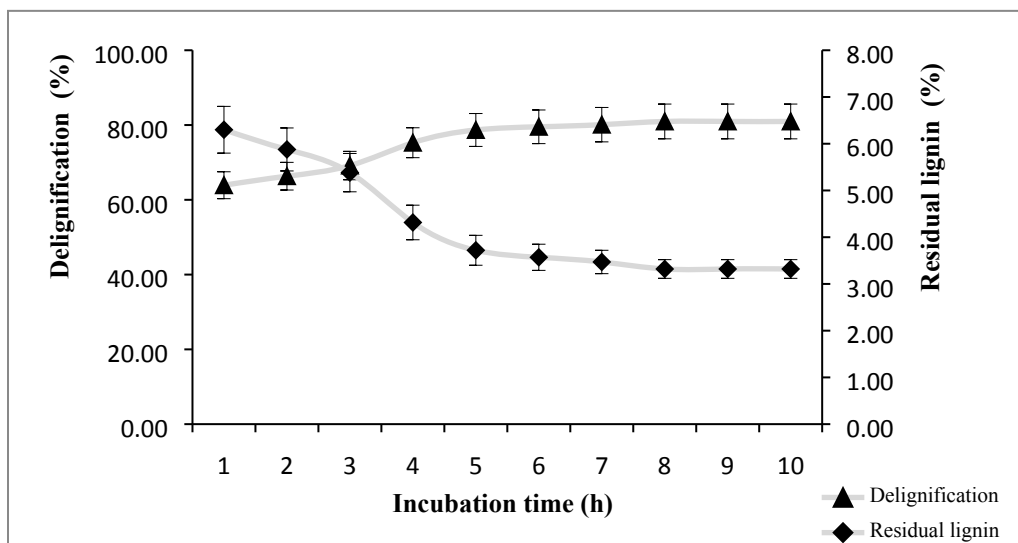

Fig. S1 (b) Effect of incubation time on enzymatic delignification

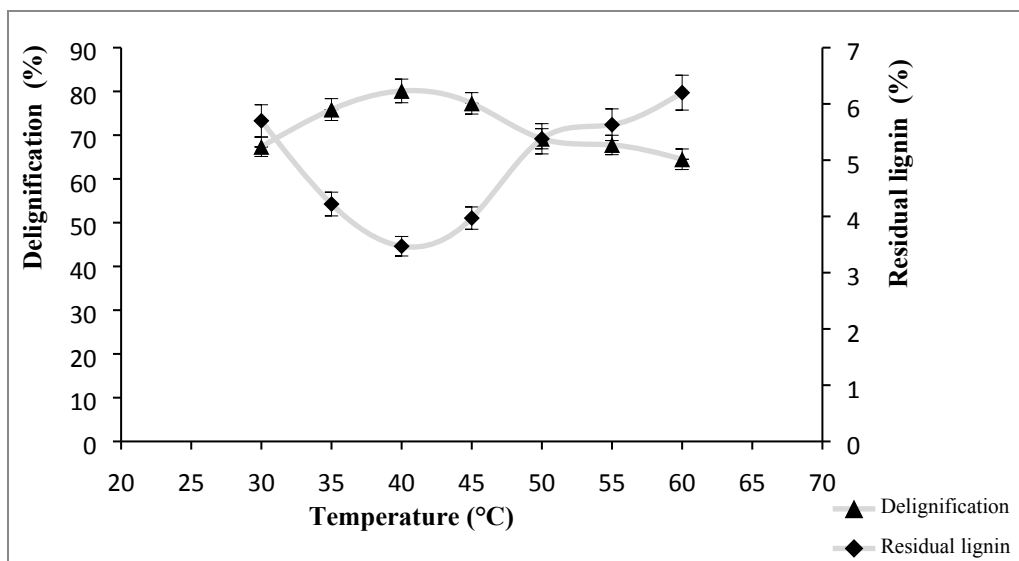

Fig. S1 (c) Effect of temperature on enzymatic delignification

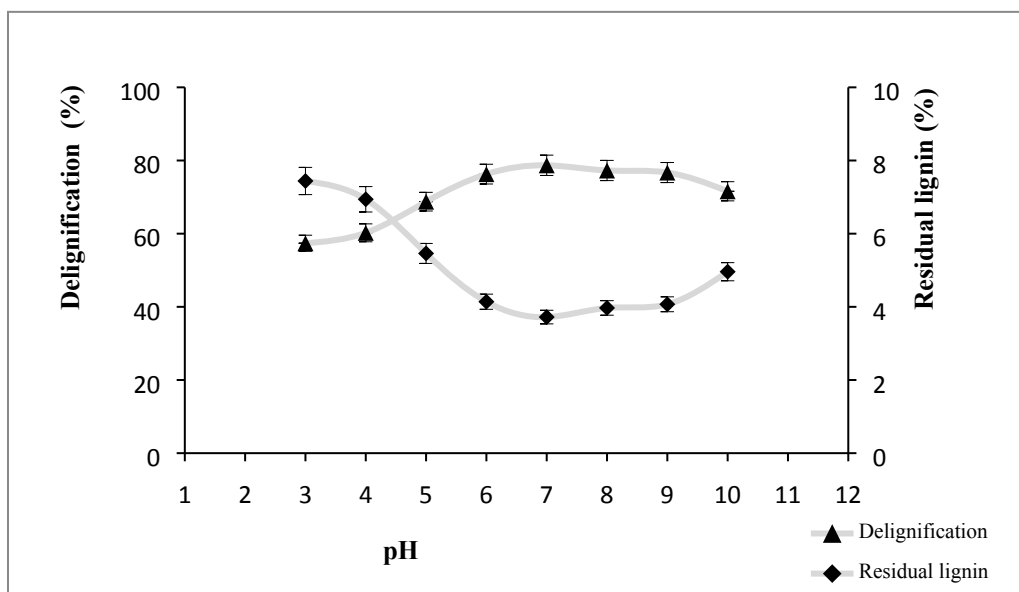

Fig. S1 (d) Effect of pH on enzymatic delignification

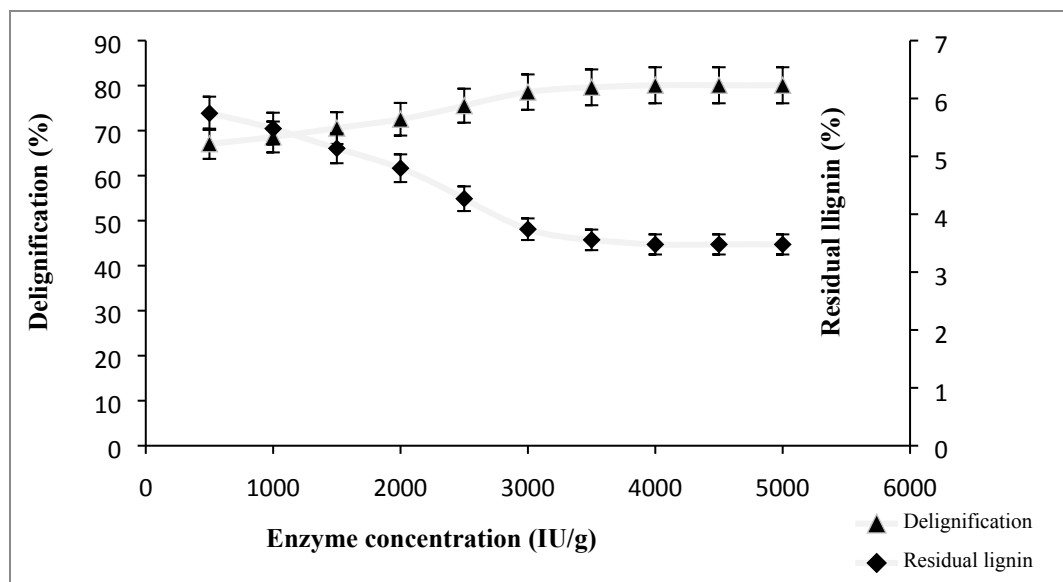

Fig. S1 (e) Effect of enzyme concentration on enzymatic delignification

**(B) One variable at a time approach (OVAT) for enzymatic hydrolysis**

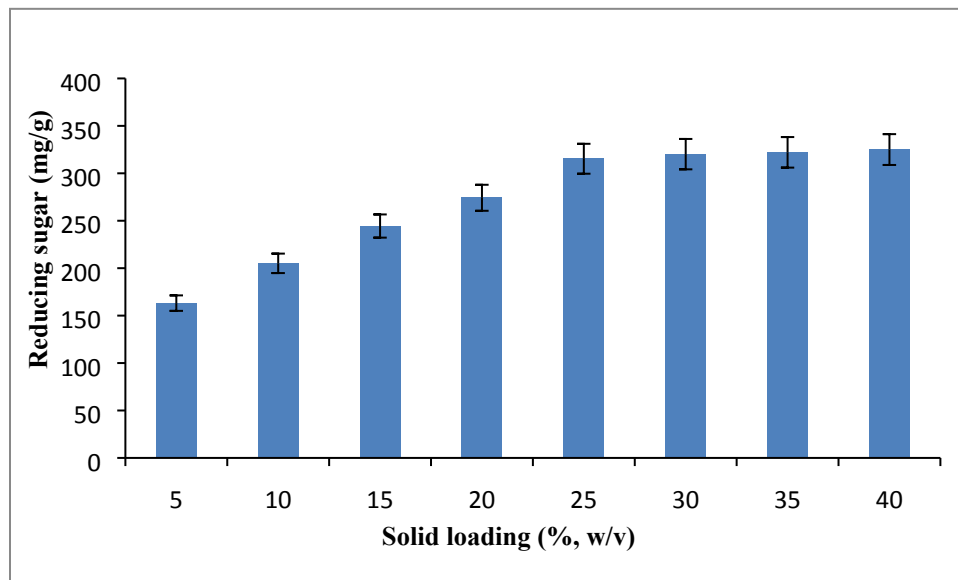

Fig. S2 (a) Effect of solid loading on enzymatic hydrolysis

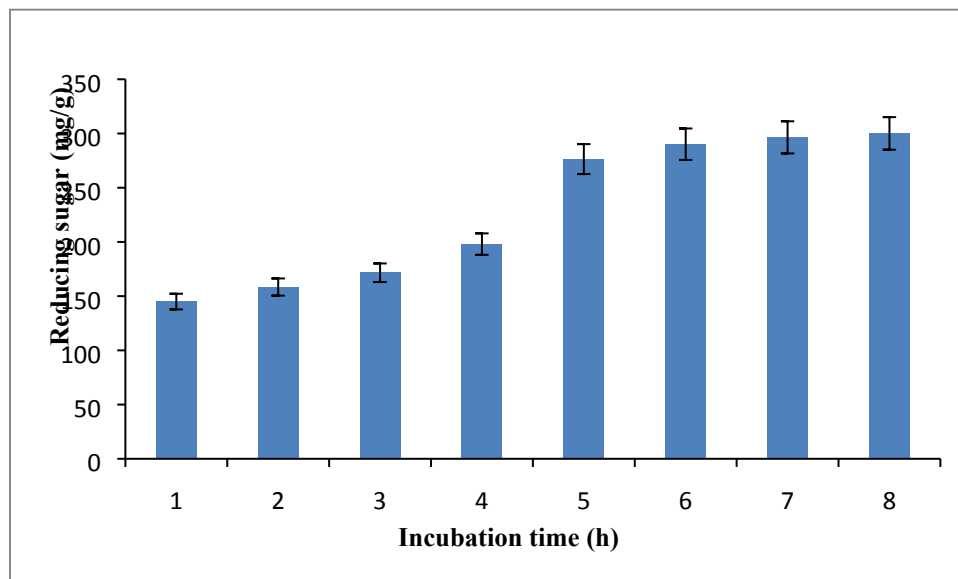

Fig. S2 (b) Effect of incubation time on enzymatic hydrolysis

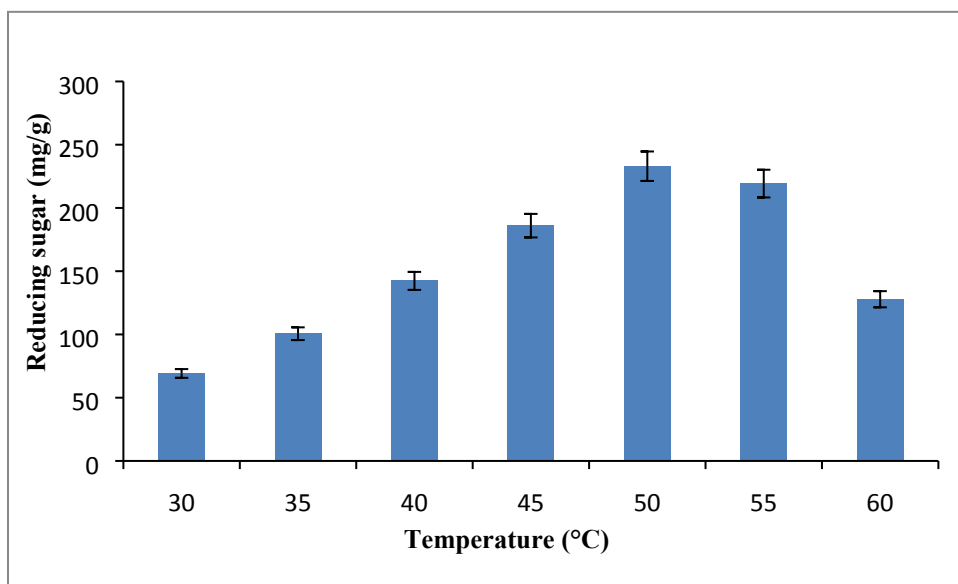

Fig. S2 (c) Effect of temperature on enzymatic hydrolysis

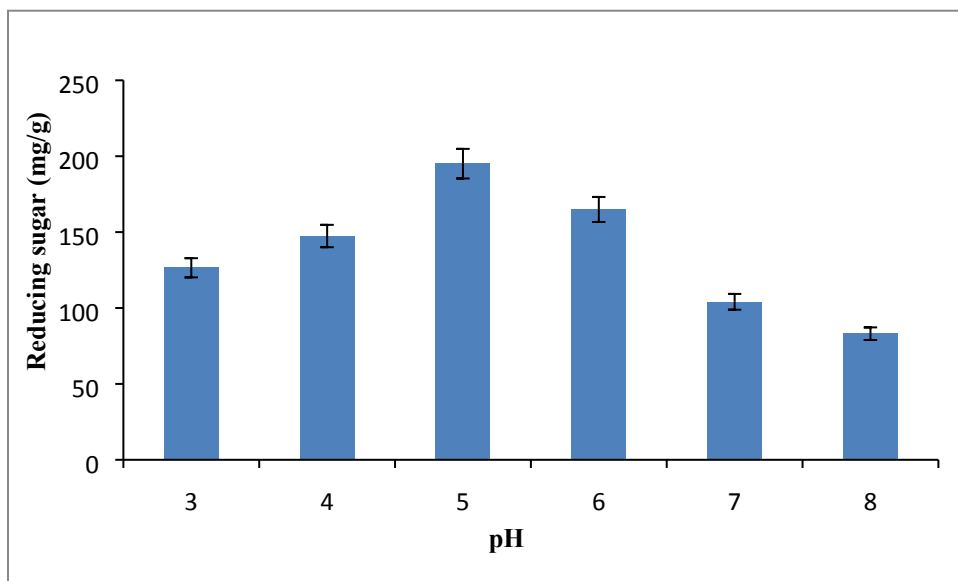

Fig. S2 (d) Effect of pH on enzymatic hydrolysis

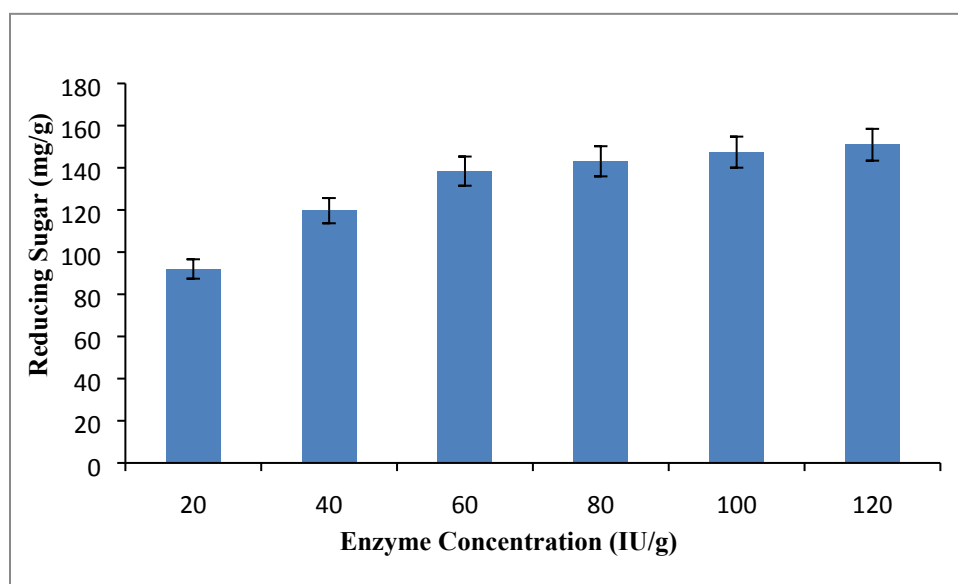

Fig. S2 (E) Effect of enzyme concentration on enzymatic hydrolysis



**Table S1** Central composite design based experimental designs (variables and responses) for enzymatic pretreatment of Kans grass in terms of coded level of variables

| Run Order | Solid Loading (%) | Incubation Time (h) | Temperature (° C) | pH | Enzyme Concentration (IU/g) | Delignification (%) |              |
|-----------|-------------------|---------------------|-------------------|----|-----------------------------|---------------------|--------------|
|           |                   |                     |                   |    |                             | Predicted           | Experimental |
| 1         | 20                | 6                   | 40                | 7  | 3000                        | 75.01               | 79.80        |
| 2         | 20                | 6                   | 35                | 6  | 3500                        | 72.23               | 72.83        |
| 3         | 20                | 5                   | 40                | 7  | 3000                        | 73.80               | 73.59        |
| 4         | 15                | 6                   | 40                | 7  | 3000                        | 72.20               | 72.83        |
| 5         | 20                | 6                   | 40                | 7  | 3000                        | 75.01               | 79.80        |
| 6         | 15                | 5                   | 35                | 8  | 3000                        | 71.75               | 72.83        |
| 7         | 20                | 6                   | 40                | 7  | 3000                        | 75.01               | 79.80        |
| 8         | 25                | 7                   | 35                | 7  | 3000                        | 72.04               | 70.48        |
| 9         | 20                | 6                   | 40                | 8  | 3500                        | 59.34               | 59.28        |
| 10        | 15                | 7                   | 45                | 7  | 3000                        | 80.09               | 80.02        |
| 11        | 25                | 6                   | 40                | 6  | 3500                        | 59.98               | 60.24        |
| 12        | 25                | 5                   | 35                | 7  | 3000                        | 71.04               | 70.18        |
| 13        | 15                | 7                   | 45                | 8  | 2500                        | 70.46               | 70.26        |
| 14        | 25                | 5                   | 35                | 6  | 2500                        | 73.02               | 73.10        |
| 15        | 15                | 5                   | 35                | 8  | 3000                        | 63.03               | 63.18        |
| 16        | 20                | 7                   | 40                | 7  | 3500                        | 73.65               | 72.18        |
| 17        | 20                | 6                   | 40                | 8  | 3500                        | 79.50               | 79.28        |
| 18        | 25                | 7                   | 35                | 8  | 3500                        | 71.86               | 71.98        |
| 19        | 20                | 6                   | 40                | 8  | 2500                        | 74.62               | 74.58        |
| 20        | 15                | 7                   | 35                | 8  | 2500                        | 63.55               | 63.18        |

|    |    |   |    |   |      |       |       |
|----|----|---|----|---|------|-------|-------|
| 21 | 15 | 5 | 45 | 7 | 3000 | 75.01 | 73.46 |
| 22 | 20 | 6 | 40 | 7 | 3000 | 75.01 | 79.80 |
| 23 | 20 | 6 | 45 | 6 | 3500 | 73.28 | 73.72 |
| 24 | 20 | 6 | 40 | 6 | 2500 | 62.14 | 62.42 |
| 25 | 20 | 6 | 40 | 6 | 3500 | 75.85 | 76.10 |
| 26 | 25 | 7 | 45 | 6 | 3000 | 74.27 | 72.26 |
| 27 | 25 | 5 | 45 | 6 | 3000 | 77.71 | 77.62 |
| 28 | 15 | 7 | 35 | 7 | 3000 | 75.01 | 73.68 |
| 29 | 20 | 6 | 40 | 6 | 2500 | 79.93 | 80.16 |
| 30 | 15 | 5 | 45 | 8 | 2500 | 71.67 | 71.26 |
| 31 | 25 | 5 | 45 | 7 | 2500 | 74.88 | 75.42 |
| 32 | 25 | 7 | 45 | 7 | 2500 | 77.41 | 76.68 |

**Table S2** Central composite design based experimental designs (variables and responses) for enzymatic hydrolysis of Kans grass in terms of coded level of variables

| Run Order | Solid Loading (%) | Incubation Time (h) | Temperature (° C) | pH | Enzyme Concentration (IU/g) | Reducing Sugar (mg/g of substrate) |              |
|-----------|-------------------|---------------------|-------------------|----|-----------------------------|------------------------------------|--------------|
|           |                   |                     |                   |    |                             | Predicted                          | Experimental |
| 1         | 25                | 5                   | 50                | 5  | 60                          | 461.44                             | 479.89       |
| 2         | 30                | 4                   | 55                | 6  | 40                          | 187.63                             | 190.48       |
| 3         | 30                | 4                   | 45                | 6  | 80                          | 152.54                             | 155.87       |
| 4         | 25                | 6                   | 50                | 5  | 60                          | 380.55                             | 377.60       |
| 5         | 20                | 6                   | 55                | 6  | 40                          | 104.56                             | 105.83       |
| 6         | 20                | 6                   | 45                | 6  | 80                          | 97.279                             | 103.02       |
| 7         | 25                | 5                   | 50                | 5  | 40                          | 280.53                             | 278.10       |
| 8         | 25                | 5                   | 50                | 5  | 60                          | 461.44                             | 479.89       |
| 9         | 20                | 4                   | 45                | 4  | 80                          | 353.26                             | 358.10       |
| 10        | 20                | 4                   | 55                | 6  | 80                          | 396.84                             | 401.68       |
| 11        | 30                | 6                   | 45                | 4  | 80                          | 97.52                              | 101.25       |
| 12        | 25                | 5                   | 50                | 5  | 80                          | 341.08                             | 336.85       |
| 13        | 25                | 5                   | 50                | 5  | 60                          | 461.44                             | 479.89       |
| 14        | 20                | 4                   | 45                | 6  | 40                          | 103.94                             | 108.81       |
| 15        | 20                | 5                   | 50                | 5  | 60                          | 322.72                             | 320.32       |
| 16        | 30                | 6                   | 55                | 4  | 40                          | 296.58                             | 299.83       |
| 17        | 30                | 4                   | 55                | 4  | 80                          | 109.20                             | 112.02       |
| 18        | 25                | 5                   | 50                | 6  | 60                          | 416.57                             | 412.23       |
| 19        | 30                | 5                   | 50                | 5  | 60                          | 316.71                             | 310.45       |
| 20        | 25                | 5                   | 50                | 5  | 60                          | 461.44                             | 479.896      |
| 21        | 25                | 5                   | 55                | 5  | 60                          | 334.74                             | 332.42       |
| 22        | 25                | 5                   | 50                | 5  | 60                          | 461.44                             | 479.896      |

|    |    |   |    |   |    |        |         |
|----|----|---|----|---|----|--------|---------|
| 23 | 20 | 4 | 55 | 4 | 40 | 151.26 | 155.62  |
| 24 | 30 | 6 | 55 | 6 | 80 | 407.16 | 410.89  |
| 25 | 20 | 6 | 55 | 4 | 80 | 432.94 | 438.18  |
| 26 | 25 | 5 | 45 | 5 | 60 | 265.33 | 260.99  |
| 27 | 25 | 5 | 50 | 5 | 60 | 461.44 | 479.896 |
| 28 | 30 | 6 | 45 | 6 | 40 | 202.62 | 206.37  |
| 29 | 25 | 4 | 50 | 5 | 60 | 360.90 | 359.18  |
| 30 | 30 | 4 | 45 | 4 | 40 | 255.27 | 258.12  |
| 31 | 25 | 5 | 50 | 4 | 60 | 455.56 | 453.24  |
| 32 | 20 | 6 | 45 | 4 | 40 | 264.48 | 269.75  |

**Table S3** The DSC-thermoporometry temperature program and the corresponding pore diameters.

| Step (i) | Temperature (°C) | Pore diameter (nm) |
|----------|------------------|--------------------|
| 0        | -30              | Estimating $C_0$   |
| 1        | -15              | 2.6                |
| 2        | -13              | 3.04               |
| 3        | -7               | 5.65               |
| 4        | -6               | 4.84               |
| 5        | -5.19            | 12.85              |
| 6        | -2               | 19.8               |
| 7        | -1.5             | 26.4               |
| 8        | -1.3             | 30.4               |
| 9        | -0.8             | 49.5               |
| 10       | -0.2             | 198                |
| 11       | -0.1             | 396                |

**Table S4** ANOVA analysis for regression coefficients and corresponding  $F$ - and  $P$ - values for enzymatic pretreatment

| Source         | DF <sup>a</sup> | Seq SS <sup>b</sup> | Adj SS <sup>b</sup> | Adj MS <sup>c</sup> | $F$   | $p$     |
|----------------|-----------------|---------------------|---------------------|---------------------|-------|---------|
| Regression     | 20              | 894.844             | 894.844             | 44.742              | 10.04 | < 0.001 |
| Linear         | 5               | 462.17              | 22.387              | 4.4774              | 1.00  | 0.459   |
| Square         | 5               | 146.30              | 146.30              | 29.261              | 6.56  | < 0.005 |
| Interaction    | 10              | 286.36              | 286.36              | 28.636              | 6.42  | 0.002   |
| Residual error | 11              | 49.038              | 49.038              | 4.4580              |       |         |
| Lack-of-fit    | 6               | 15.471              | 15.471              | 2.5785              | 0.38  | 0.862   |
| Pure error     | 5               | 33.567              | 33.567              | 6.7134              |       |         |
| Total          | 31              | 943.882             |                     |                     |       |         |

$R^2 = 94.80 \%$ ,  $R^2(\text{adj}) = 85.36 \%$

a Degrees of Freedom.

b Sum of Squares.

c Mean Squares.

**Table S5** ANOVA analysis for regression coefficients and corresponding *F*- and *P*- values for enzymatic hydrolysis

| Source         | DF <sup>a</sup> | Seq SS <sup>b</sup> | Adj SS <sup>b</sup> | Adj MS <sup>c</sup> | <i>F</i> | <i>p</i> |
|----------------|-----------------|---------------------|---------------------|---------------------|----------|----------|
| Regression     | 20              | 476212              | 476212.6            | 23810.6             | 11.20    | <0.001   |
| Linear         | 5               | 50128               | 50104               | 10025.6             | 4.72     | 0.015    |
| Square         | 5               | 251949              | 241946              | 50389.7             | 23.71    | <0.001   |
| Interaction    | 10              | 174136              | 174139              | 17413.6             | 8.19     | 0.001    |
| Residual error | 11              | 23378               | 23378.1             | 2125.3              |          |          |
| Lack-of-fit    | 6               | 13378               | 13378.1             | 3896.3              |          | 0.031    |
| Pure error     | 5               |                     |                     |                     |          |          |
| Total          | 31              | 499590              |                     |                     |          |          |

$R^2 = 95.32\%$ ,  $R^2(\text{adj}) = 86.81\%$

a Degrees of Freedom.

b Sum of Squares.

c Mean Squares.

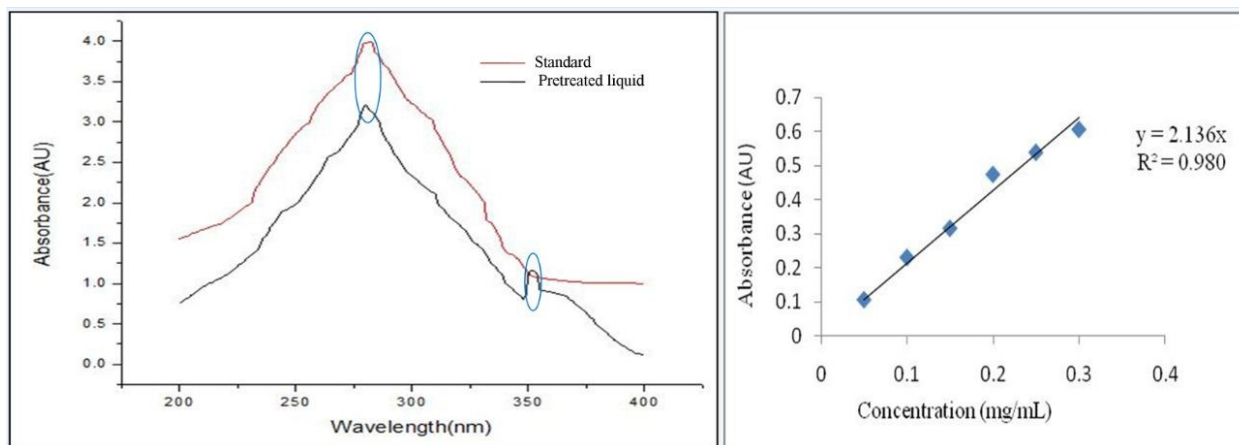

**Fig. S3** (a) UV-spectra of pretreated liquid and standard at various concentrations (b) shows the standard Kraft lignin concentrations against absorbance 280 nm.

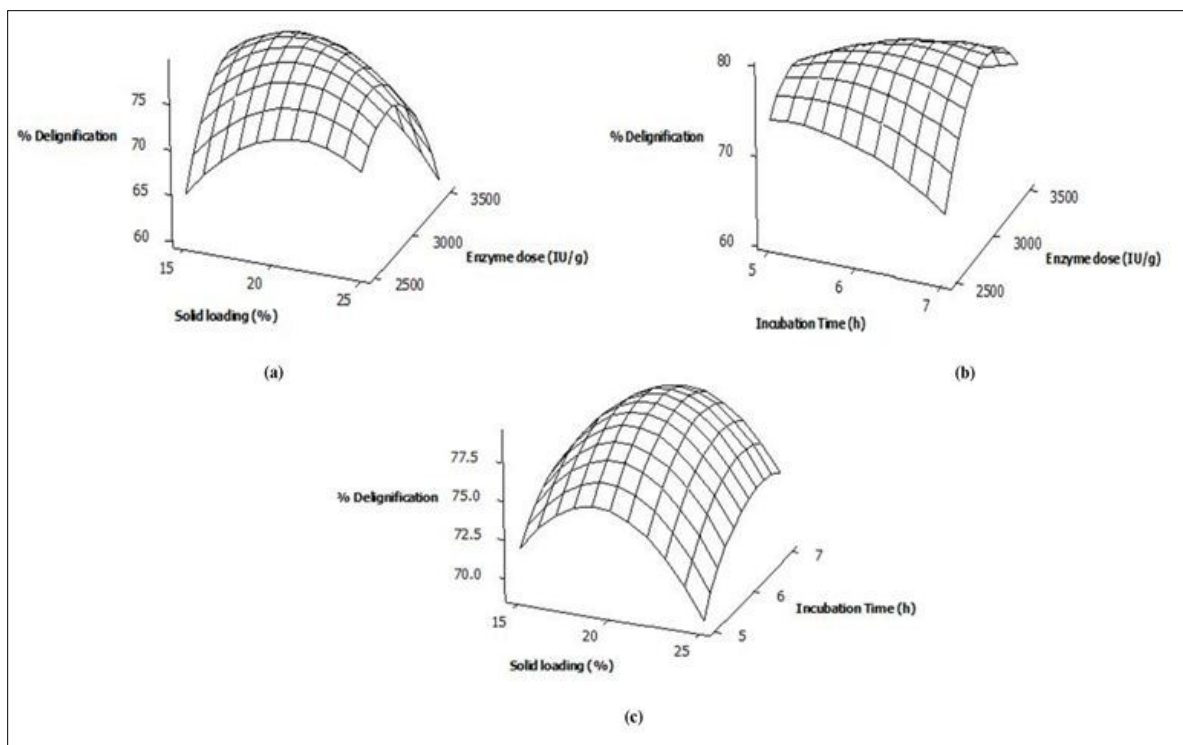

**Fig. S4** Response surface plots for (a) solid loading and enzyme dose (b) incubation time and enzyme dose (c) solid loading and incubation time. % delignification represents amount of lignin degraded and horizontal axis represents different process variables.

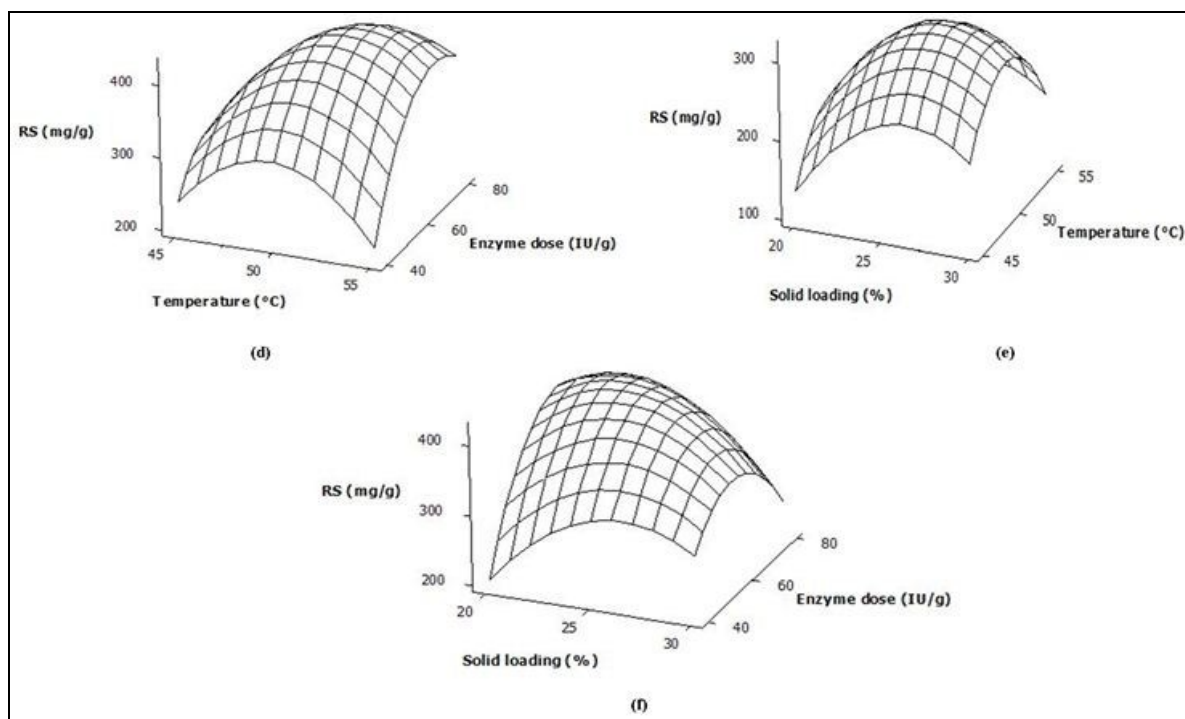

**Fig. S5** Response surface plots for (d) temperature and enzyme dose (e) solid loading and temperature (f) solid loading and enzyme dose. RS represents reducing sugar concentration and horizontal axis represents different process variables.



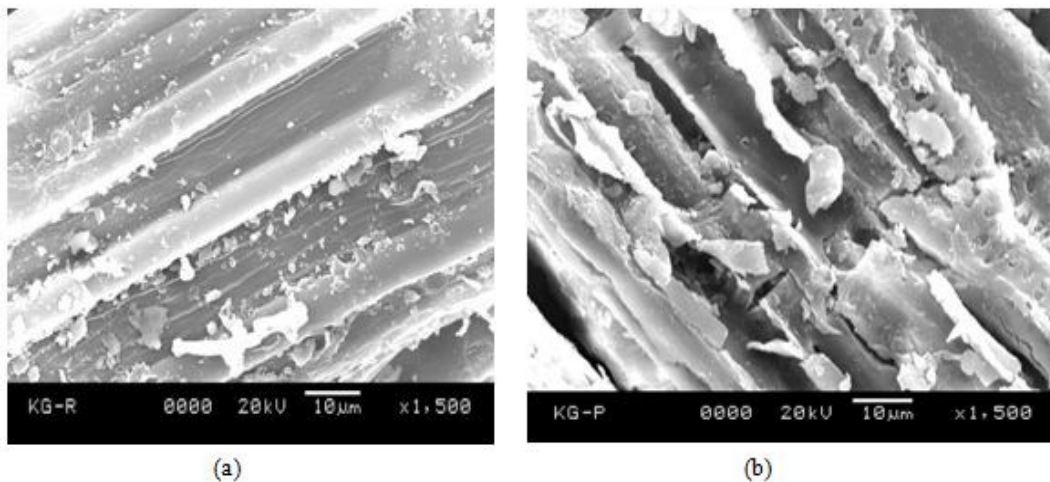

**Fig. S6** SEM images for (a) raw substrate (b) pretreated substrate.

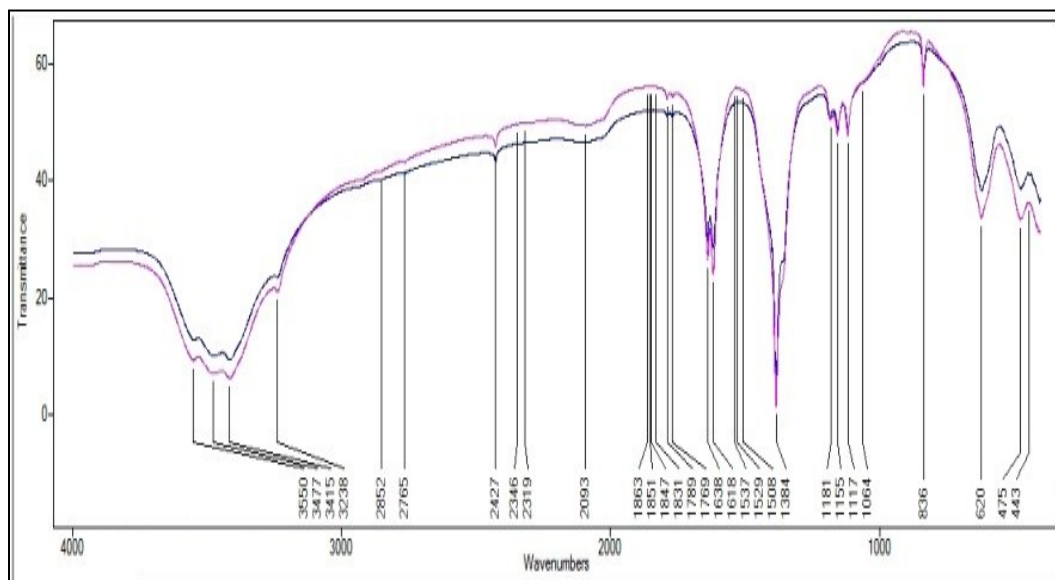

**Fig. S6 (c)** FT-IR spectra for raw and pretreated substrate.

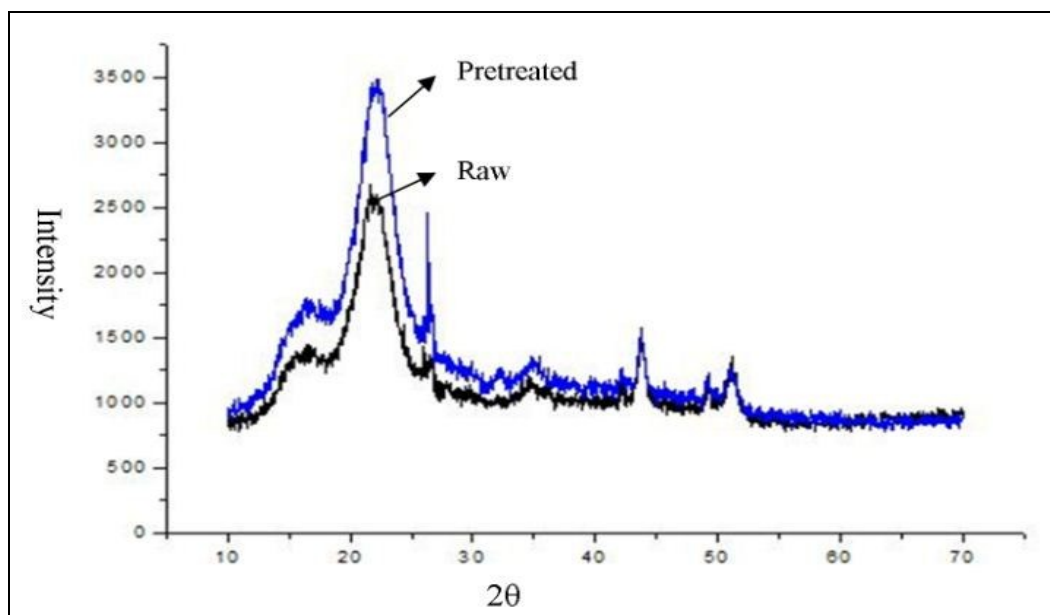

**Fig. S7** XRD for raw and pretreated substrate.
